# Supplementary material
Source: publisher figshare collection journal article supplement (https://tandf.figshare.com/articles/dataset/_/3496328)
Supplement: Supplementary file 1 [file 1]

**Table 1S.** Compositions of phosphate and silicate in calibration set and test set.

| Mixture | Calibration set <sup>a</sup> (mg L <sup>-1</sup> ) |          | Mixture | Test set <sup>b</sup> (mg L <sup>-1</sup> ) |          |
|---------|----------------------------------------------------|----------|---------|---------------------------------------------|----------|
| No.     | Phosphate                                          | Silicate | No.     | Phosphate                                   | Silicate |
| C1      | 1.0                                                | 5        | T1      | 0.5                                         | 20       |
| C2      | 1.0                                                | 100      | T2      | 0.5                                         | 50       |
| C3      | 0.1                                                | 55       | T3      | 1.5                                         | 30       |
| C4      | 2.0                                                | 55       | T4      | 0.3                                         | 70       |
| C5      | 0.3                                                | 20       | T5      | 1.0                                         | 50       |
| C6      | 0.3                                                | 85       | T6      | 1.5                                         | 60       |
| C7      | 1.7                                                | 85       |         |                                             |          |
| C8      | 1.7                                                | 20       |         |                                             |          |
| C9      | 1.0                                                | 55       |         |                                             |          |
| C10     | 1.0                                                | 55       |         |                                             |          |
| C11     | 1.0                                                | 55       |         |                                             |          |
| C12     | 1.0                                                | 55       |         |                                             |          |

<sup>a</sup> Calibration set obtained by central composite design.<sup>b</sup> Test set (validation set) obtained by random design.

**Table 2S.** Predicted concentration of phosphate and silicate in calibration set

| Mixture<br>No. | Phosphate (mgP L <sup>-1</sup> ) |                            | Silicate (mgSi L <sup>-1</sup> ) |                            |
|----------------|----------------------------------|----------------------------|----------------------------------|----------------------------|
|                | Calibration<br>concentration     | Predicted<br>concentration | Calibration<br>concentration     | Predicted<br>concentration |
| C1             | 1.00                             | 0.99                       | 5                                | 4.5                        |
| C2             | 1.00                             | 0.96                       | 100                              | 92.2                       |
| C3             | 0.10                             | 0.12                       | 55                               | 52.7                       |
| C4             | 2.00                             | 2.03                       | 55                               | 57.0                       |
| C5             | 0.30                             | 0.24                       | 20                               | 21.6                       |
| C6             | 0.30                             | 0.35                       | 85                               | 84.7                       |
| C7             | 1.70                             | 1.72                       | 85                               | 78.8                       |
| C8             | 1.70                             | 1.60                       | 20                               | 22.6                       |
| C9             | 1.00                             | 1.05                       | 55                               | 57.2                       |
| C10            | 1.00                             | 0.96                       | 55                               | 53.8                       |
| C11            | 1.00                             | 0.96                       | 55                               | 55.8                       |
| C12            | 1.00                             | 1.03                       | 55                               | 57.4                       |

**Table 3S.** Analytical recovery from simultaneous determination of phosphate and silicate in water samples obtained from the proposed system.

| Sample | Concentration of phosphate $\pm$ SD <sup>a</sup> |       |                 |              | Concentration of silicate $\pm$ SD <sup>a</sup> |       |                  |              |
|--------|--------------------------------------------------|-------|-----------------|--------------|-------------------------------------------------|-------|------------------|--------------|
|        | (mgP L <sup>-1</sup> )                           |       |                 |              | (mgSi L <sup>-1</sup> )                         |       |                  |              |
|        | Initial                                          | Added | Found           | Recovery (%) | Initial                                         | Added | Found            | Recovery (%) |
| X1     | 0.21 $\pm$ 0.03                                  | 0.2   | 0.40 $\pm$ 0.02 | 96.0         | 5.90 $\pm$ 0.95                                 | 10    | 15.57 $\pm$ 0.95 | 101.8        |
| X2     | 0.17 $\pm$ 0.02                                  | 0.2   | 0.37 $\pm$ 0.03 | 98.5         | 6.05 $\pm$ 1.63                                 | 10    | 15.15 $\pm$ 1.37 | 95.8         |
| Y1     | 0.37 $\pm$ 0.02                                  | 0.2   | 0.55 $\pm$ 0.01 | 90.9         | 5.55 $\pm$ 1.02                                 | 10    | 16.10 $\pm$ 3.06 | 107.7        |
| Y2     | 0.41 $\pm$ 0.02                                  | 0.2   | 0.59 $\pm$ 0.01 | 90.9         | 5.59 $\pm$ 1.24                                 | 10    | 16.07 $\pm$ 1.87 | 106.9        |
| Y3     | 0.34 $\pm$ 0.01                                  | 0.2   | 0.55 $\pm$ 0.01 | 106.0        | 5.65 $\pm$ 2.02                                 | 10    | 14.80 $\pm$ 0.98 | 93.4         |
| Y4     | 0.37 $\pm$ 0.01                                  | 0.2   | 0.57 $\pm$ 0.02 | 101.0        | 6.00 $\pm$ 0.42                                 | 10    | 14.60 $\pm$ 1.39 | 90.5         |
| Z1     | 1.08 $\pm$ 0.01                                  | 0.2   | 1.29 $\pm$ 0.02 | 106.1        | 9.12 $\pm$ 0.01                                 | 10    | 19.53 $\pm$ 1.10 | 106.2        |
| Z2     | 1.08 $\pm$ 0.01                                  | 0.2   | 1.29 $\pm$ 0.02 | 106.1        | 9.41 $\pm$ 0.51                                 | 10    | 19.10 $\pm$ 1.61 | 98.9         |
| Z3     | 1.38 $\pm$ 0.03                                  | 0.2   | 1.59 $\pm$ 0.01 | 103.5        | 10.60 $\pm$ 1.04                                | 10    | 20.38 $\pm$ 1.20 | 102.9        |

<sup>a</sup> Standard deviation (SD) obtained from 3 replicated injections.
